# Supplementary material
Source: Research Square preprint supplement (doi:10.21203/rs.3.rs-9525577/v1)
Supplement: Supplementary file 1 [file 7771f4d7cca6c44b83e66347.xlsx]

## Sheet: Table 1
Table 1 Reported cases of primary osteosarcoma of the lung
Case no.	Author	Year	Age	Gender	Clinical Findings	location	Tumor size (cm)	Surgery	Chemotherapy	Radiatherapy	status	Survival time (months)
1	Greenspan	1933	35	Female	Fever, chest pain	Left lung	≥ 7	No	No	No	dead	11
2	Yamashita et al.	1964	74	Female	Asthma-like	Left lung	≥ 7	No	No	No	dead	6
3	Nosanchuk	1969	66	Male	Dyspnea, chest pain, and cough	Left lung	≥ 7	No	No	No	dead	5
4	Reingold and Amromin	1971	62	Male	Pneumonia	Right lung	＜7	No	Yes	No	dead	7
5			56	Female	Fever, chest pain，chills	Left lung	≥ 7	Yes	No	No	alive	14
6	Nascimento et al.	1982	77	Female	No symptoms	Right lung	＜7	Yes	No	No	dead	6
7			72	Male	No symptoms	Right lung	＜7	Yes	No	No	dead	10
8	Colby et al. (	1989	51	Male	cough	Left lung	≥ 7	Yes	No	No	alive	6
9			77	Female	Pneumonia	Right lung	＜7	Yes	No	No	dead	6
10	Loose et al.	1990	54	Male	Chest pain, left upper extremity paresthesia	Left lung	≥ 7	Yes	Yes	Yes	alive	7
11			45	Female	Chest pain	Left lung	＜7	Yes	No	Yes	alive	2
12	Petersen	1990	70	Male	No symptoms	Left lung	＜7	Yes	No	Yes	alive	6
13	Bhalla et al.	1992	58	Male	Fever, cough	Left lung	≥ 7	No	No	No	dead	4
14	Sievert et al.	2000	56	Male	Tingling in left fingertips	Left lung	＜7	Yes	No	No	alive	12
15	Chapman et al.	2000	33	Female	Cough, chest pain	Left lung	＜7	Yes	Yes	Yes	alive	42
16	Magishi et al.	2004	74	Female	No symptoms	Left lung	＜7	Yes	No	No	dead	11
17	Kadowaki et al.	2005	72	Male	Chest pain, dyspnea	Left lung	≥ 7	No	No	No	dead	1
18			77	Male	Hemoptysis，Back pain	Left lung	≥ 7	No	No	No	dead	3
19	Yamazaki et al.	2006	73	Male	Cough, hemoptysis	Left lung	≥ 7	Yes	No	No	dead	7
20	Niimi et al	2008	72	Male	dyspnea	Left lung	≥ 7	No	No	No	dead	1
21	Karfis EA,	2010	58	Female	No symptoms	Left lung	＜7	Yes	Yes	Yes	alive	6
22	Wajstaub S.	2011	77	Male	No symptoms	Right lung	＜7	Yes	No	Yes	dead	25
23	Shenjere et al.	2011	66	Male	Found on assessment for trapped nerve	Left lung	＜7	Yes	No	No	alive	12
24			79	Male	chest pain	Left lung	≥ 7	No	No	Yes	dead	5
25	Zhai et al.	2021	51	Male	cough, hemoptysis	Left lung	≥ 7	Yes	No	No	alive	6
26	Wen et al.	2024	17	Male	cough, hemoptysis	Left lung	＜7	Yes	Yes	No	alive	96
27	Mandava et al.	2025	64	Male	chest pain, breathlessness	Left lung	≥ 7	No	No	No	dead	1
28	Current case	2025	64	Male	cough, fever	Right lung	＜7	No	No	Yes	alive	1
